# Supplementary material
Source: Springer Nature journal article supplement (https://www.springermedizin.de/resource/supplementary/12974_2011_410_MOESM5_ESM.pdf/9601234)

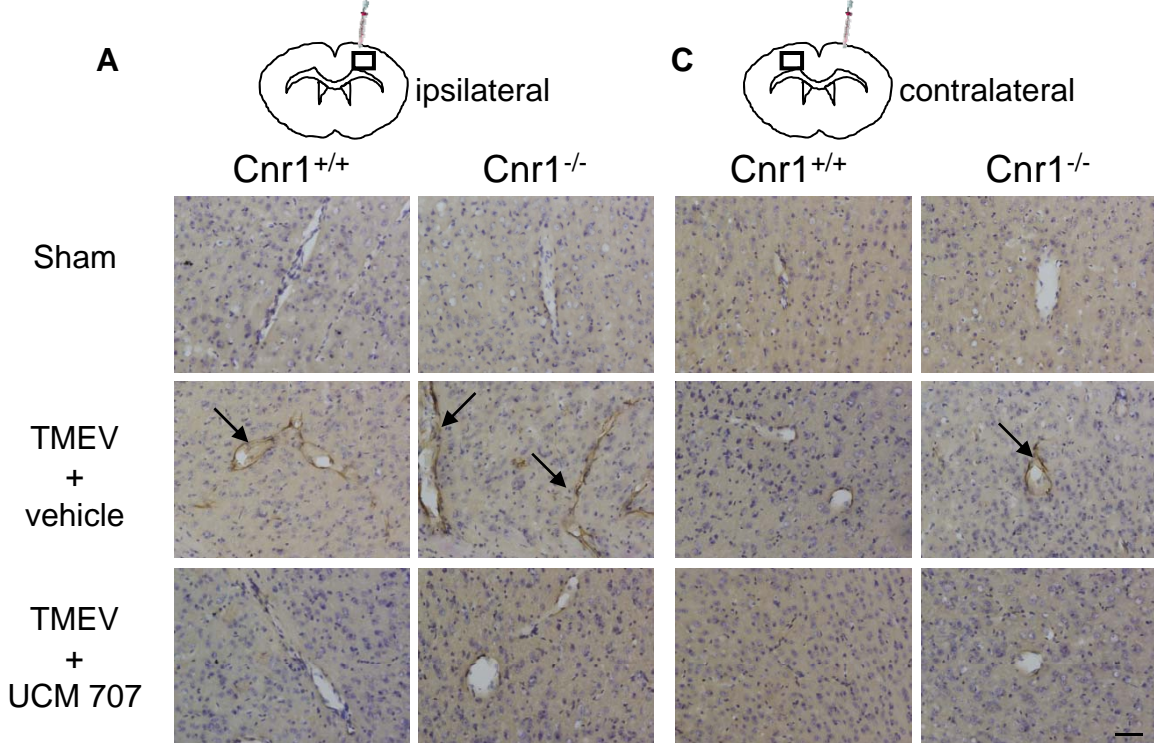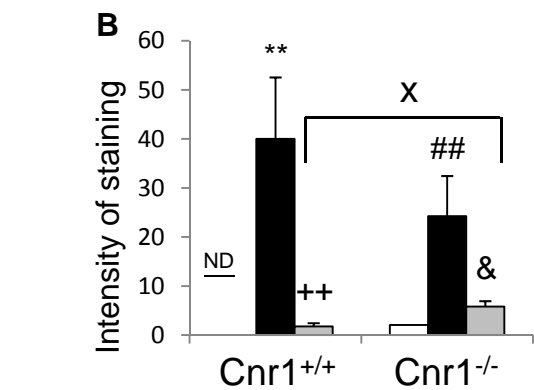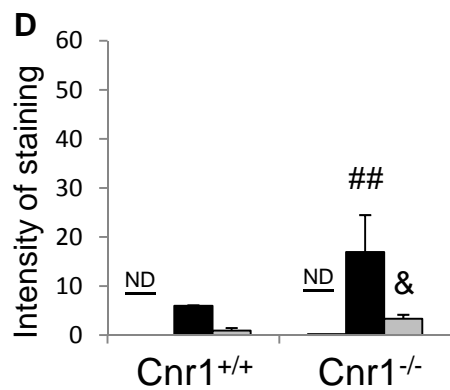

□ Sham    ■ TMEV+vehicle    ▒ TMEV+UCM 707

Supplement: MOESM5 [file 9601234]
